# Supplementary material for: lncRNA-AC079061.1/VIPR1 axis may suppress the development of hepatocellular carcinoma: a bioinformatics analysis and experimental validation
Source: J Transl Med. 2022 Aug 29;20:379. doi: 10.1186/s12967-022-03573-7 (PMC9422102; doi:10.1186/s12967-022-03573-7)

**Supplementary Table . The functional enrichment analysis of 100 VIPR1-related genes**

| ONTOLOGY  | ID         | Description                                                               | GeneRatio | BgRatio   | pvalue   | p.adjust | qvalue   |
|-----------|------------|---------------------------------------------------------------------------|-----------|-----------|----------|----------|----------|
| <b>BP</b> | GO:0001867 | complement activation, lectin pathway                                     | 4/73      | 13/18670  | 1.50e-07 | 2.33e-04 | 1.83e-04 |
| <b>BP</b> | GO:1904018 | positive regulation of vasculature development                            | 9/73      | 230/18670 | 2.74e-07 | 2.33e-04 | 1.83e-04 |
| <b>BP</b> | GO:0045766 | positive regulation of angiogenesis                                       | 8/73      | 204/18670 | 1.30e-06 | 7.36e-04 | 5.79e-04 |
| <b>BP</b> | GO:0007188 | adenylate cyclase-modulating G protein-coupled receptor signaling pathway | 8/73      | 221/18670 | 2.36e-06 | 0.001    | 7.90e-04 |
| <b>BP</b> | GO:1901342 | regulation of vasculature development                                     | 10/73     | 422/18670 | 5.46e-06 | 0.002    | 0.001    |
| <b>CC</b> | GO:0005581 | collagen trimer                                                           | 6/79      | 87/19717  | 1.33e-06 | 2.13e-04 | 1.95e-04 |
| <b>CC</b> | GO:0062023 | collagen-containing extracellular matrix                                  | 10/79     | 406/19717 | 4.99e-06 | 3.99e-04 | 3.65e-04 |
| <b>CC</b> | GO:0030014 | CCR4-NOT complex                                                          | 2/79      | 17/19717  | 0.002    | 0.100    | 0.091    |
| <b>CC</b> | GO:0099056 | integral component of presynaptic membrane                                | 3/79      | 73/19717  | 0.003    | 0.100    | 0.091    |
| <b>CC</b> | GO:0046930 | pore complex                                                              | 2/79      | 23/19717  | 0.004    | 0.100    | 0.091    |
| <b>MF</b> | GO:0030246 | carbohydrate binding                                                      | 9/70      | 271/17697 | 1.17e-06 | 1.99e-04 | 1.55e-04 |
| <b>MF</b> | GO:0005126 | cytokine receptor binding                                                 | 9/70      | 286/17697 | 1.82e-06 | 1.99e-04 | 1.55e-04 |
| <b>MF</b> | GO:0005201 | extracellular matrix structural constituent                               | 7/70      | 163/17697 | 3.64e-06 | 2.66e-04 | 2.07e-04 |
| <b>MF</b> | GO:0048029 | monosaccharide binding                                                    | 4/70      | 75/17697  | 2.21e-04 | 0.012    | 0.009    |
| <b>MF</b> | GO:0048018 | receptor ligand activity                                                  | 8/70      | 482/17697 | 6.14e-04 | 0.027    | 0.021    |

## **Supplementary Figure legend**

### **Supplementary Figure 1 Immune infiltration analysis of VIP and ADCYAP1**

**A. C.** Explored the correlation between immune infiltration and VIP and ADCYAP1 through the ssGSEA algorithm in the “GSVA” R package. **B. D.** Evaluated the correlation between Treg/Tem/NK/iDC cells and VIP, Tem/NK/iDC/Mast cells and ADCYAP by the Pearson correlation analysis.  $*P<0.05$ ,  $**P<0.01$ ,  $***P<0.001$ .

### **Supplementary Figure 2 The methylation analysis of VIPR1 in HCC**

**A.** The correlation between VIPR1 expression and methyltransferases in HCC. **B.** The methylation level of VIPR1 in disease tissues and normal tissues by DiseaseMeth 2.0 database. **C.** The CpG expression level of VIPR1 in HCC. **D.** The methylation site of VIPR1 DNA sequence association with gene expression was visualized using MEXPRESS. The expression of VIPR1 is illustrated by the blue line in the center of the plot. Pearson’s correlation coefficients and p values for methylation sites and query gene expression are shown on the right side.

**Supplementary Figure 3** Confirmation of the stable downregulation of lncRNA-AC079061.1 transfected with lncRNA-AC079061.1 siRNA into MHCC97H and HCCLM3 HCC cells by qRT-PCR.  $*P<0.05$ ,  $**P<0.01$ ,  $***P<0.001$ .

### **Supplementary Figure 4**

The correlation between drugs and the VIPR1 mRNA expression of HCC in CTRP and GDSC database.

**A**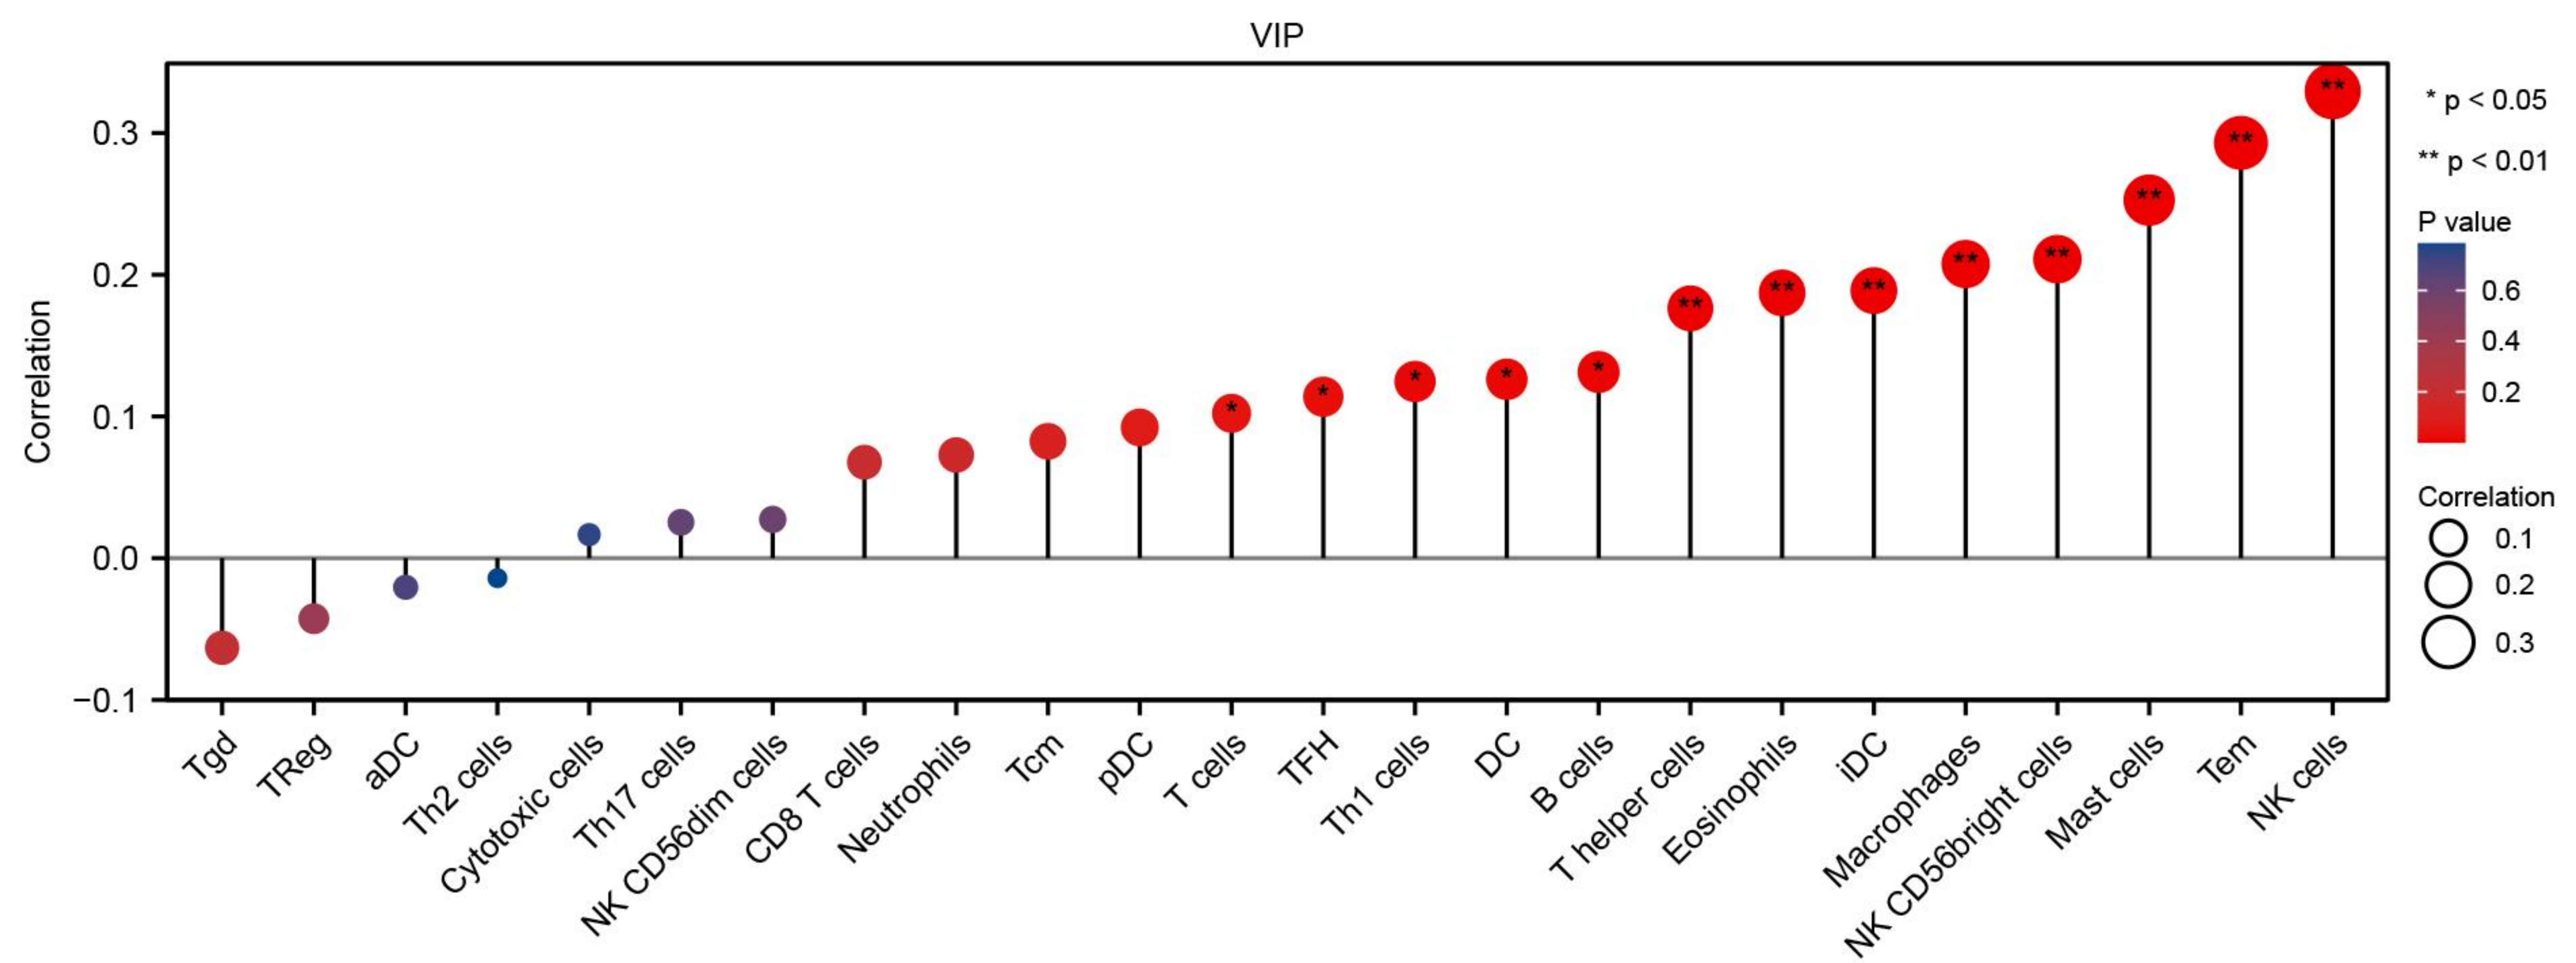**B**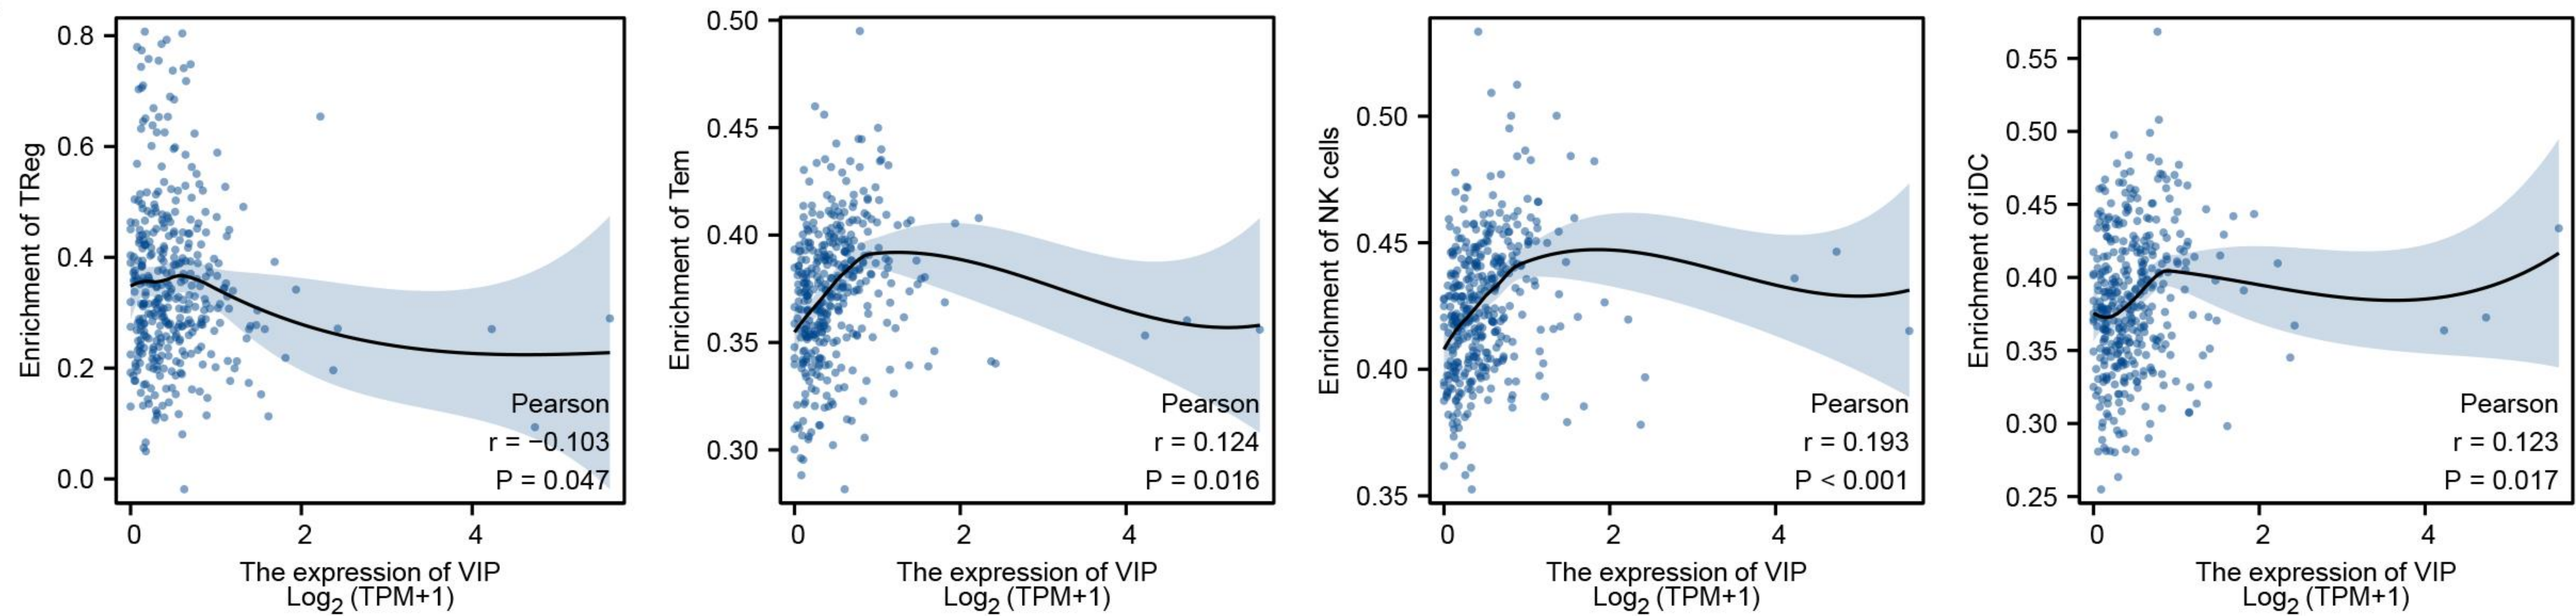**C**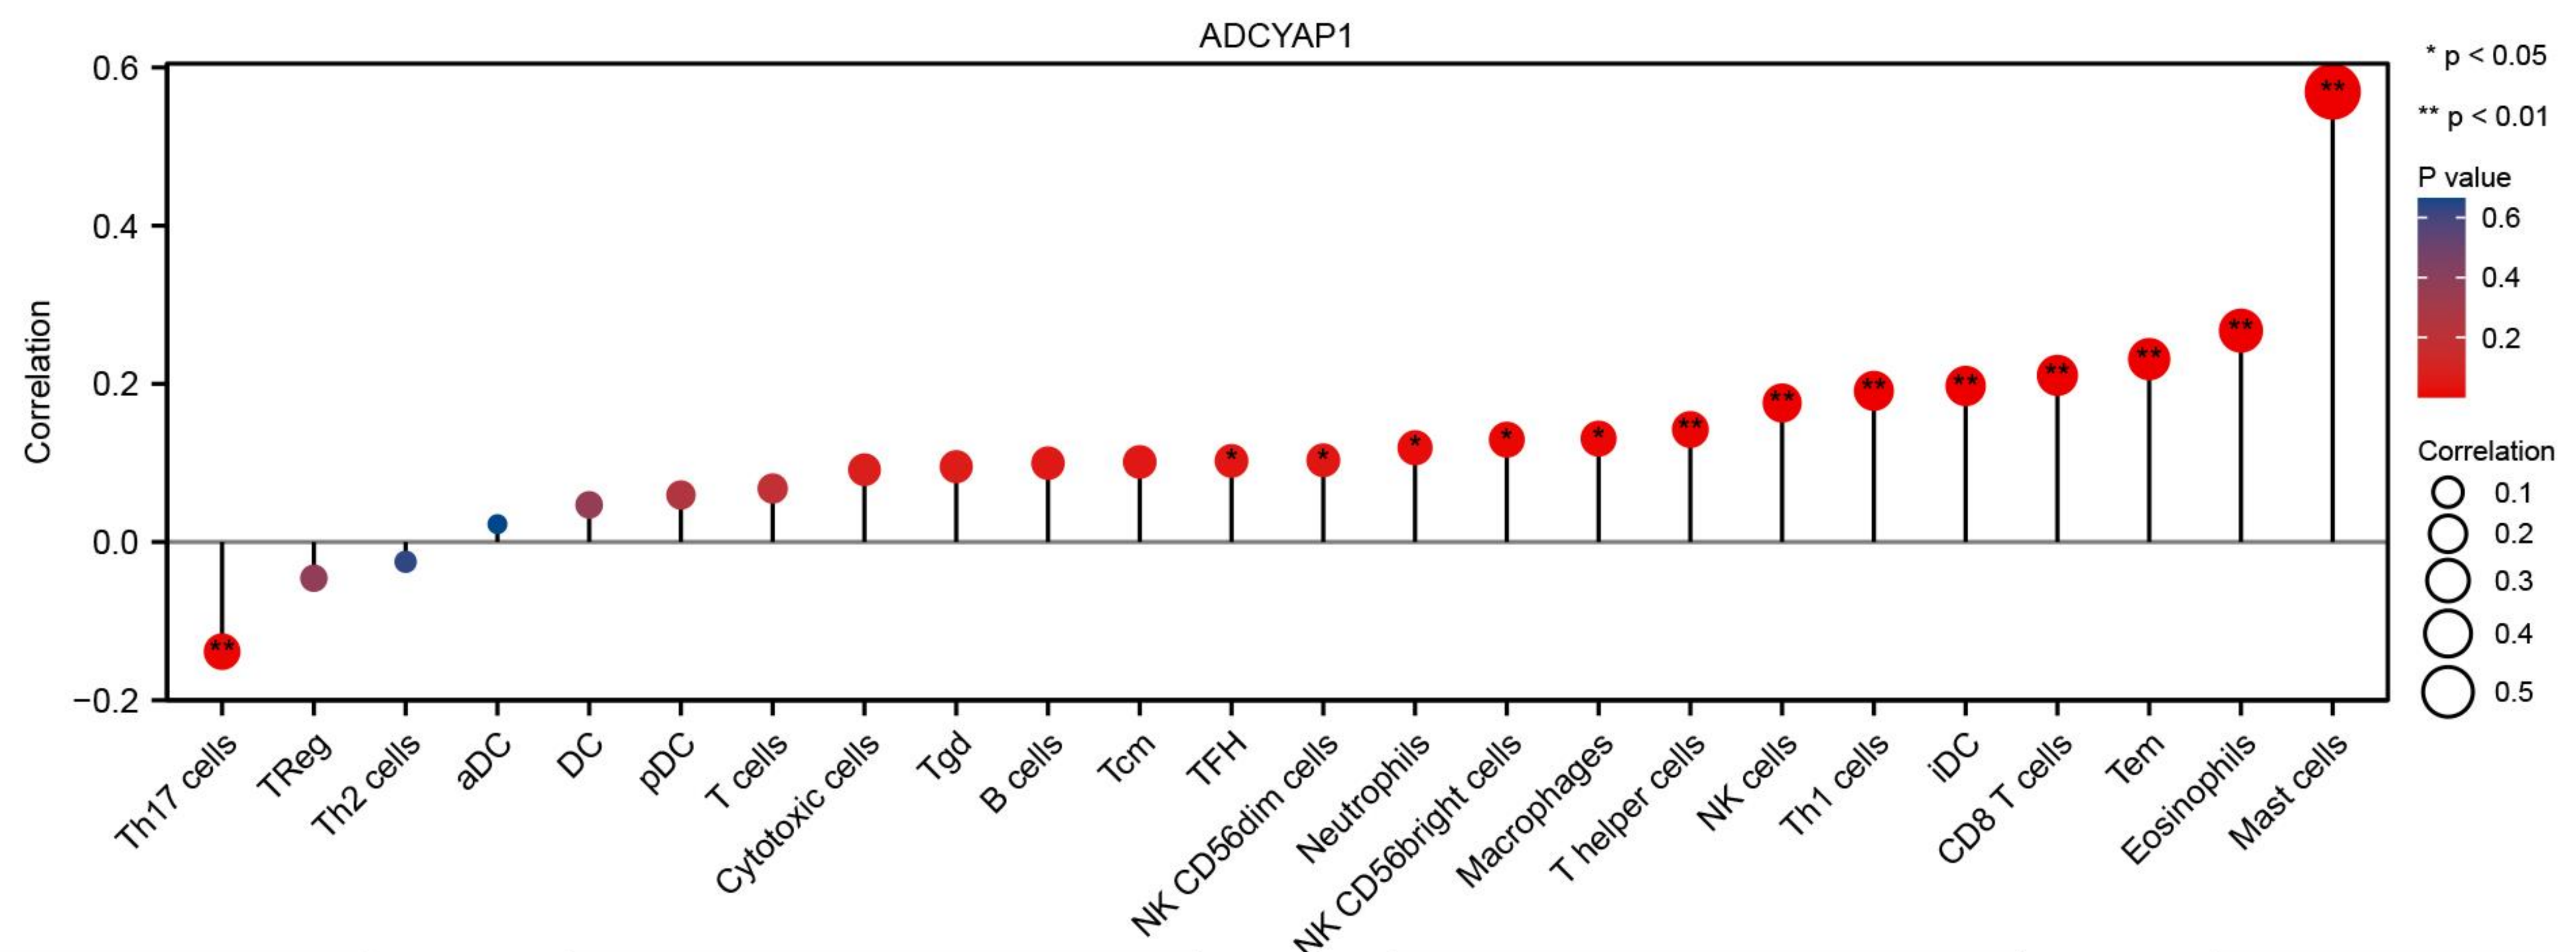**D**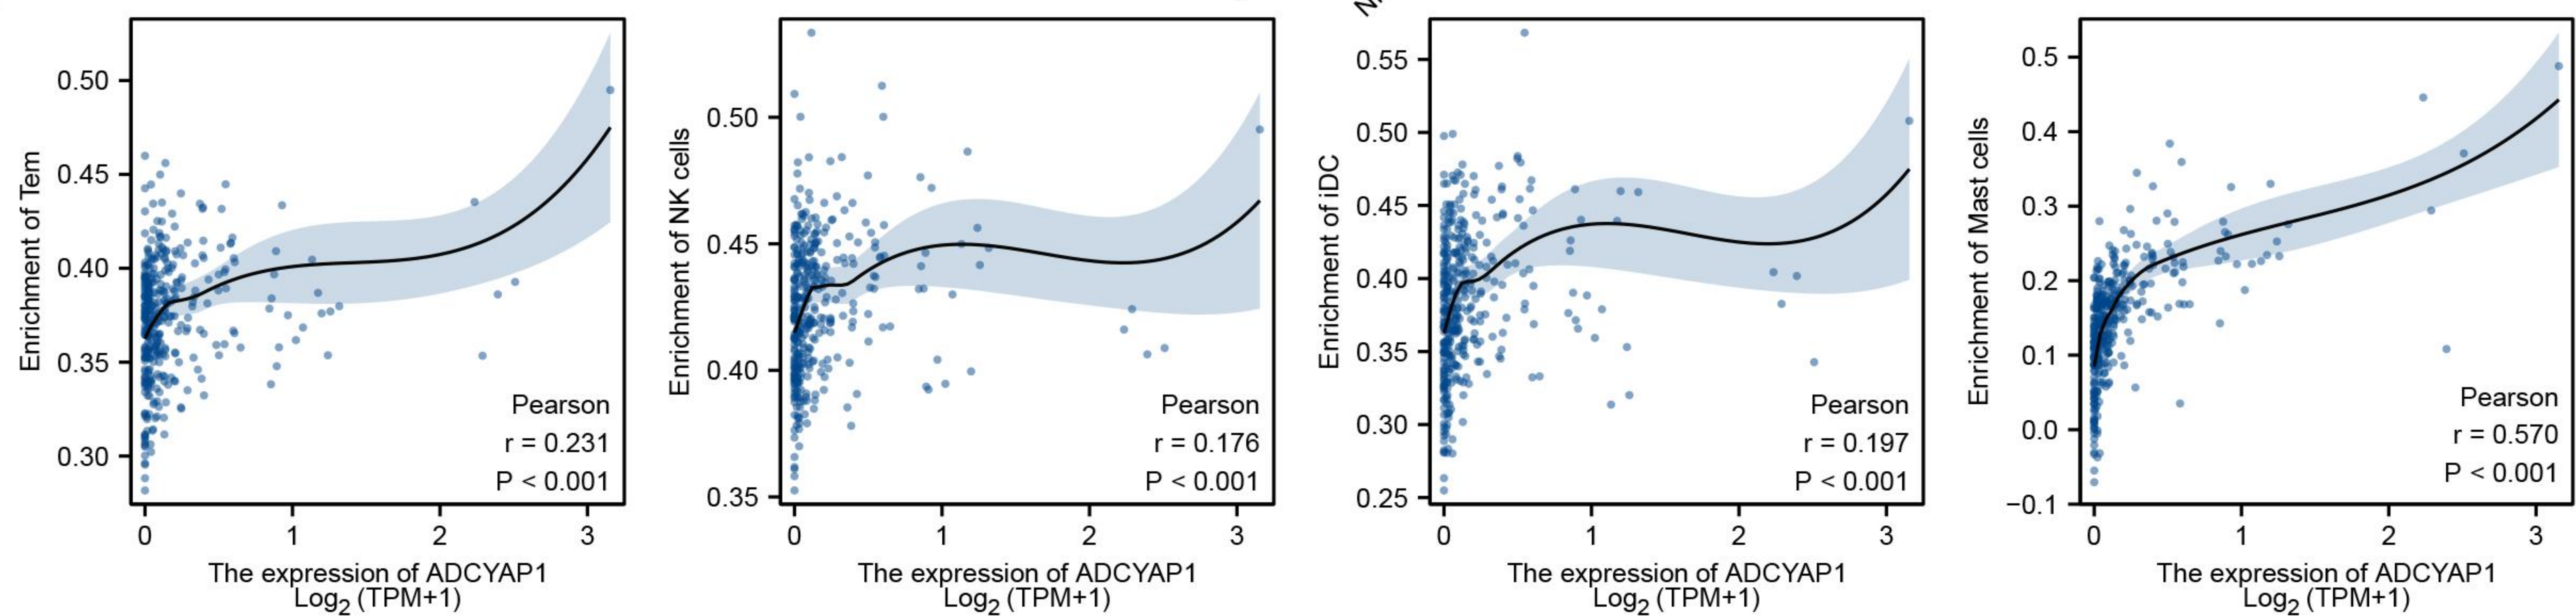

A

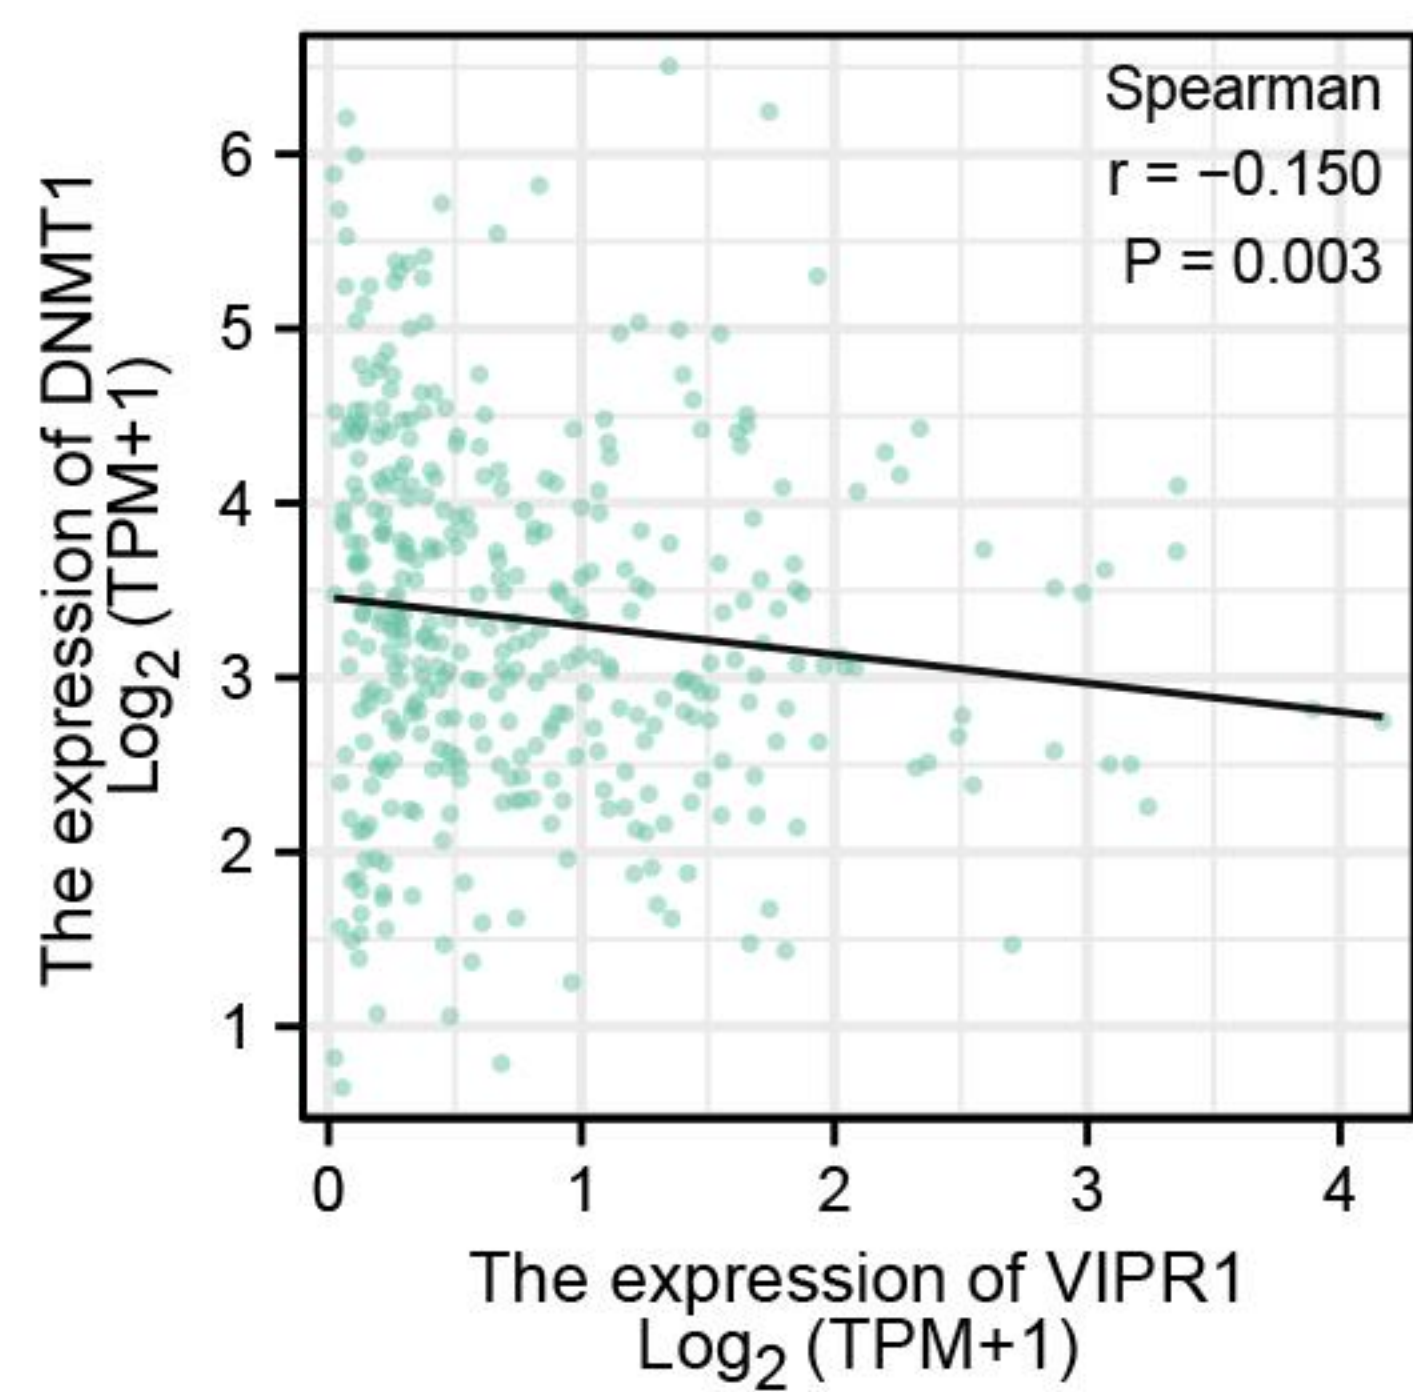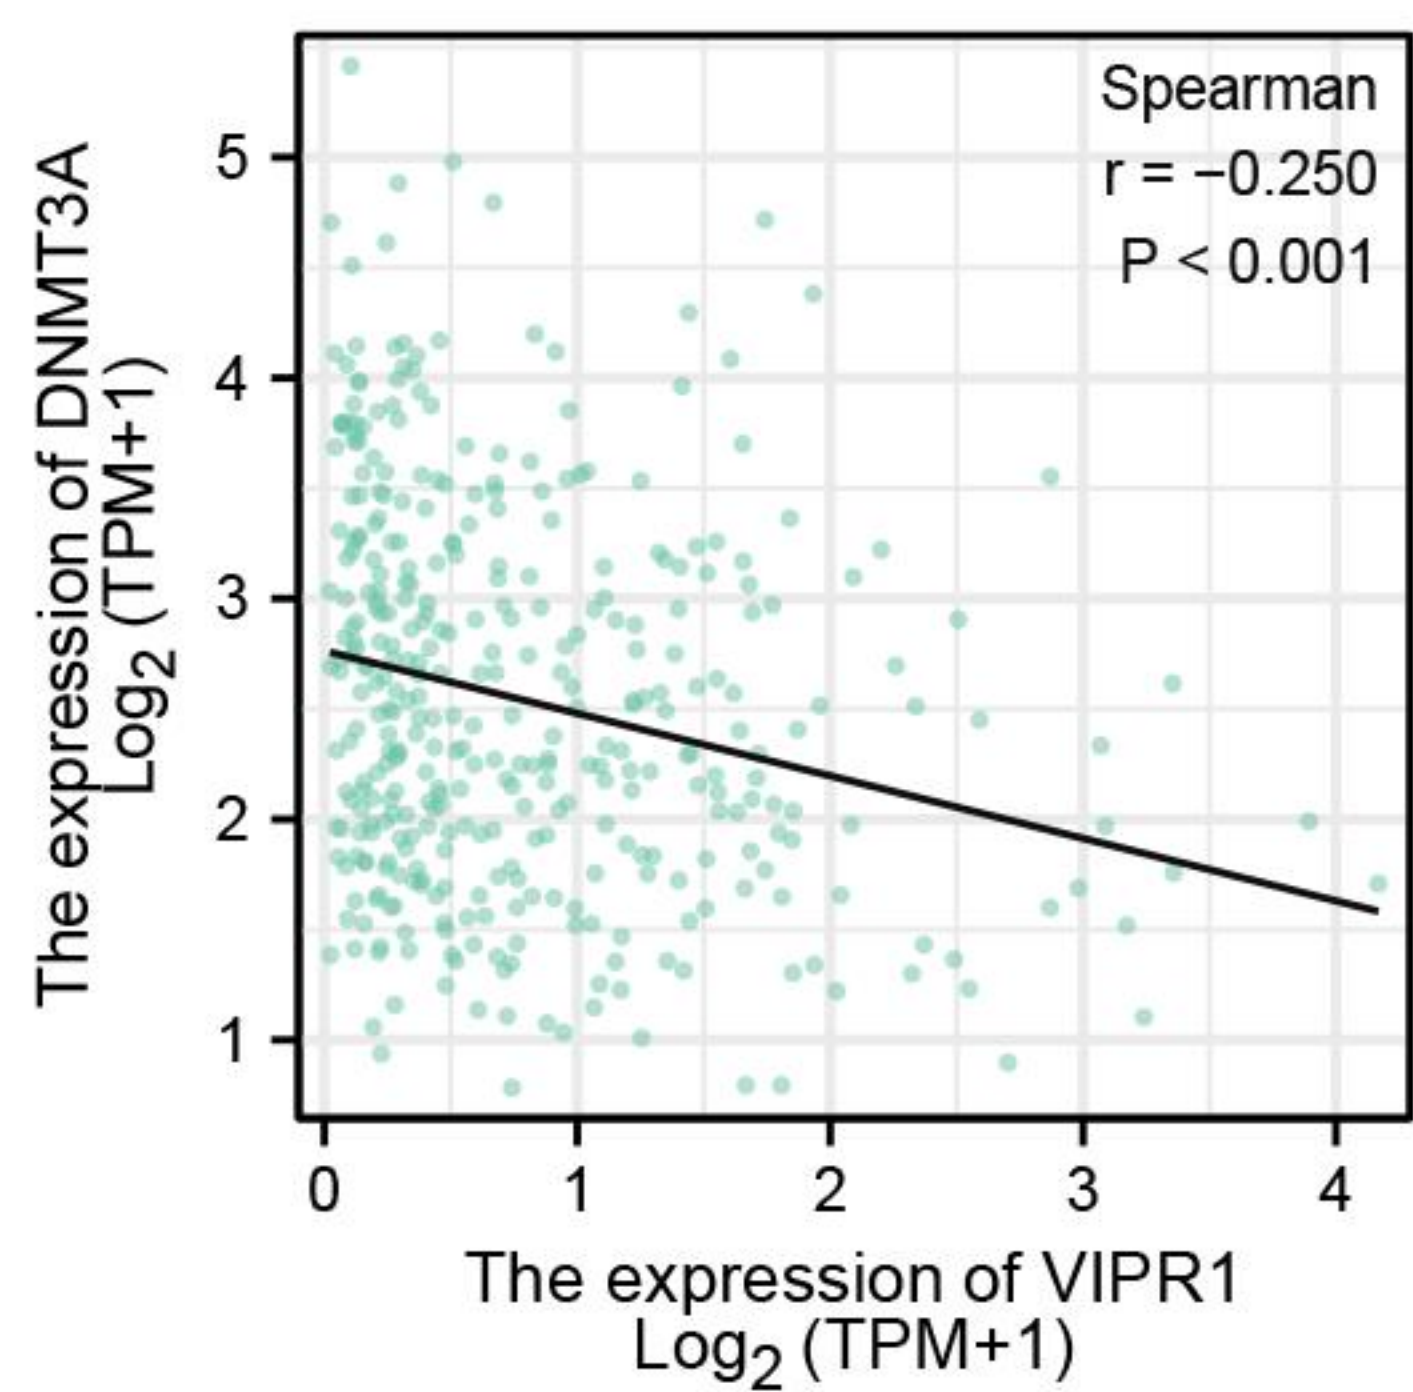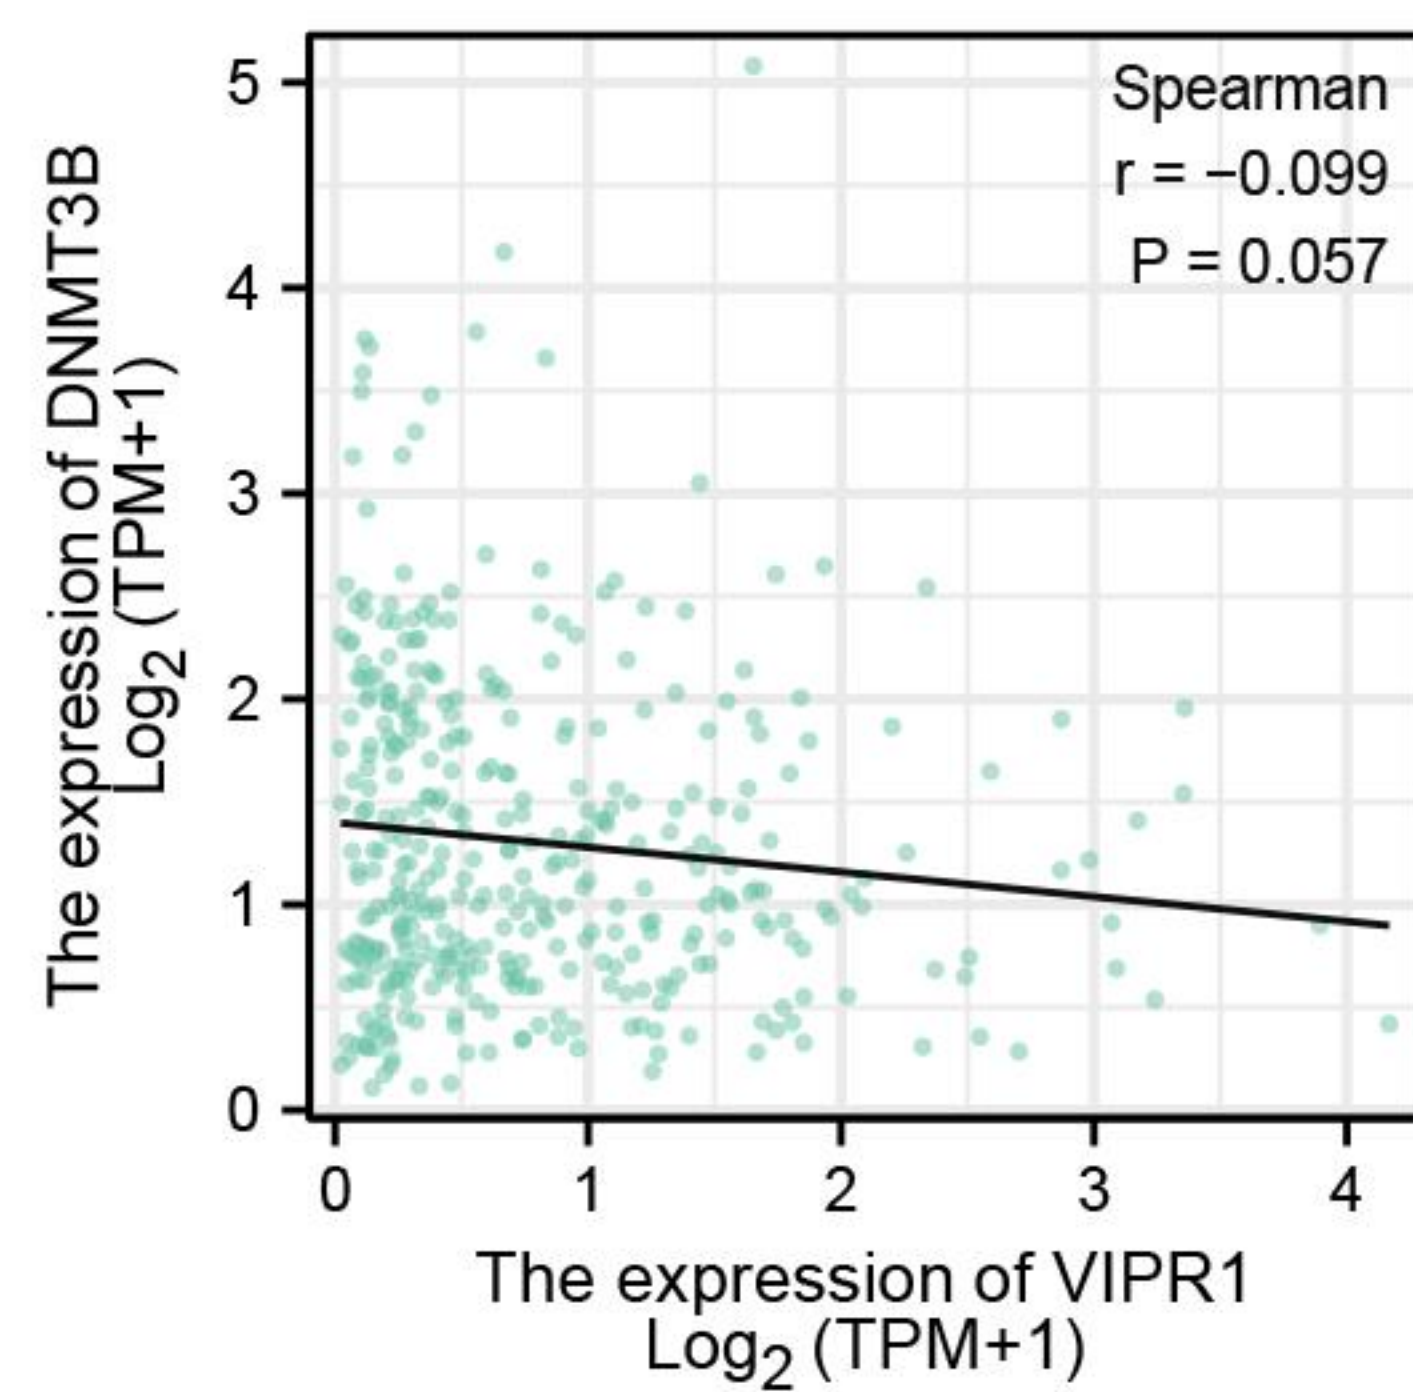

B

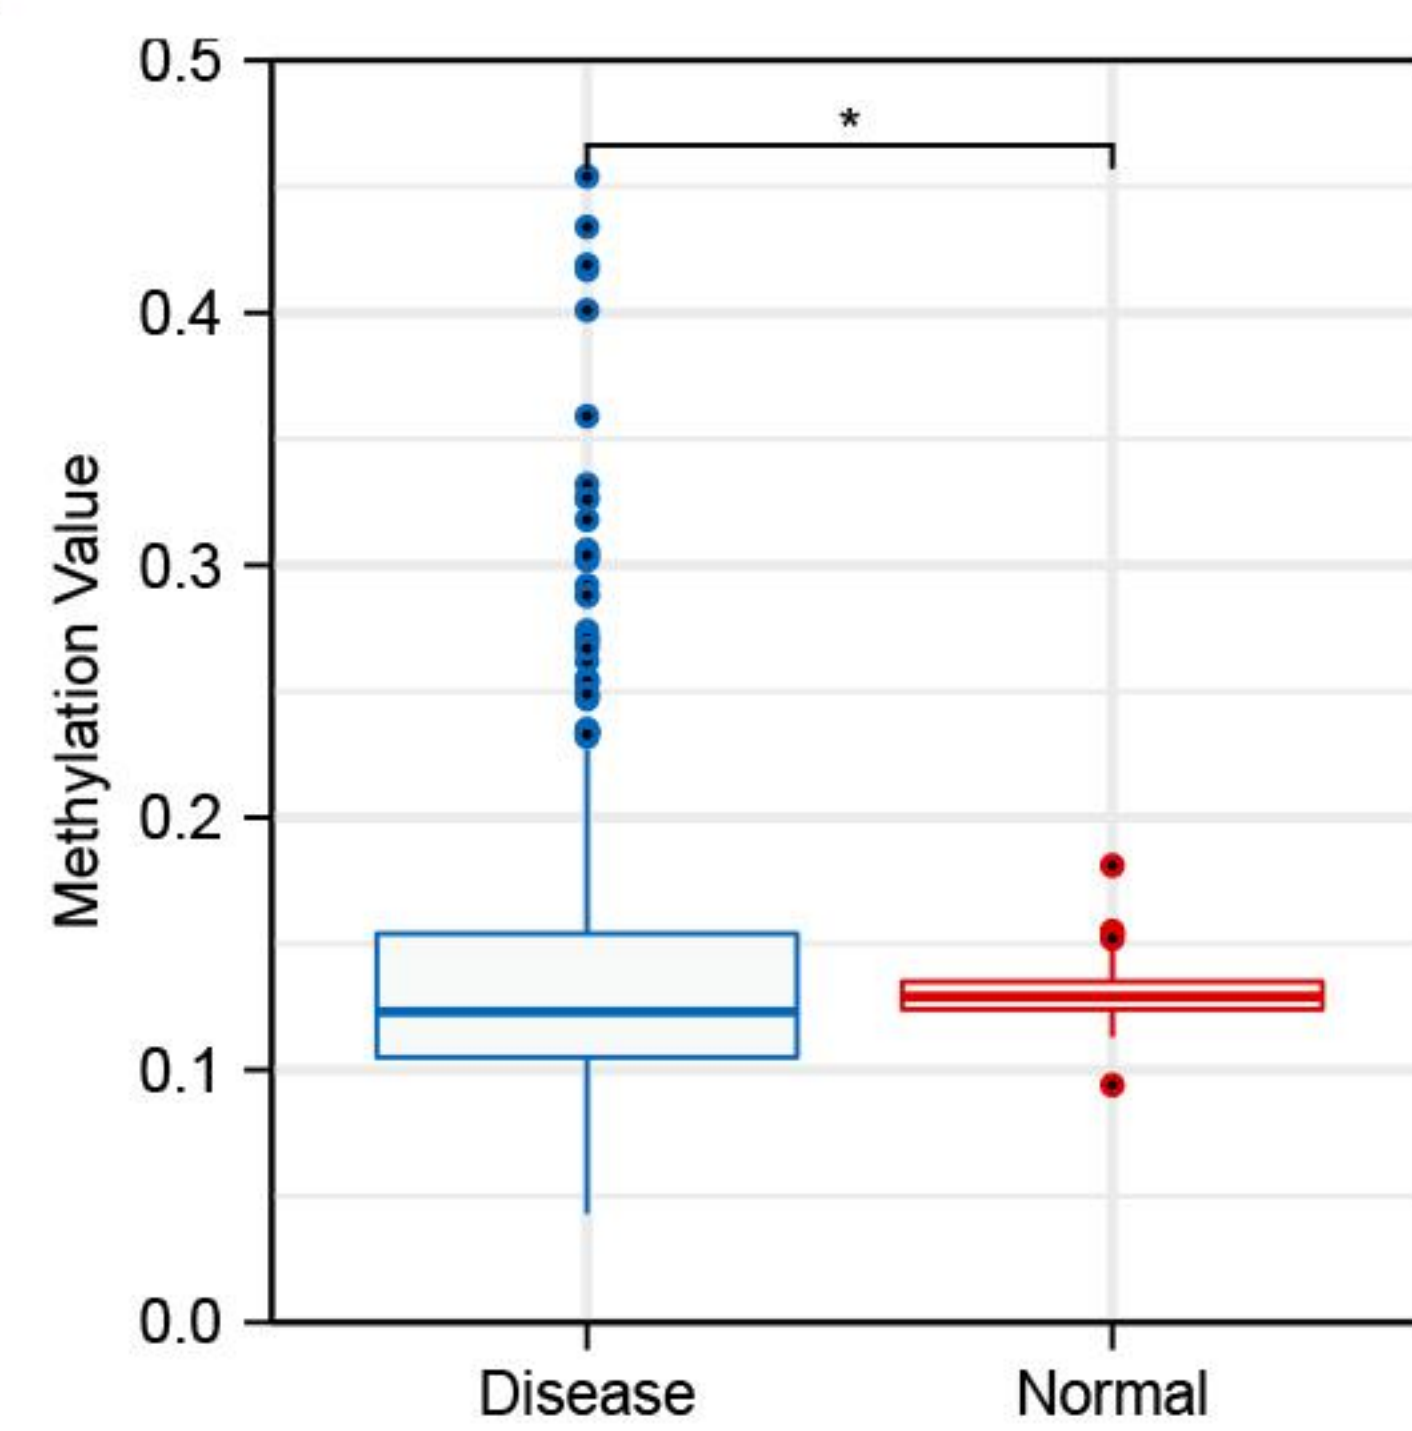

C

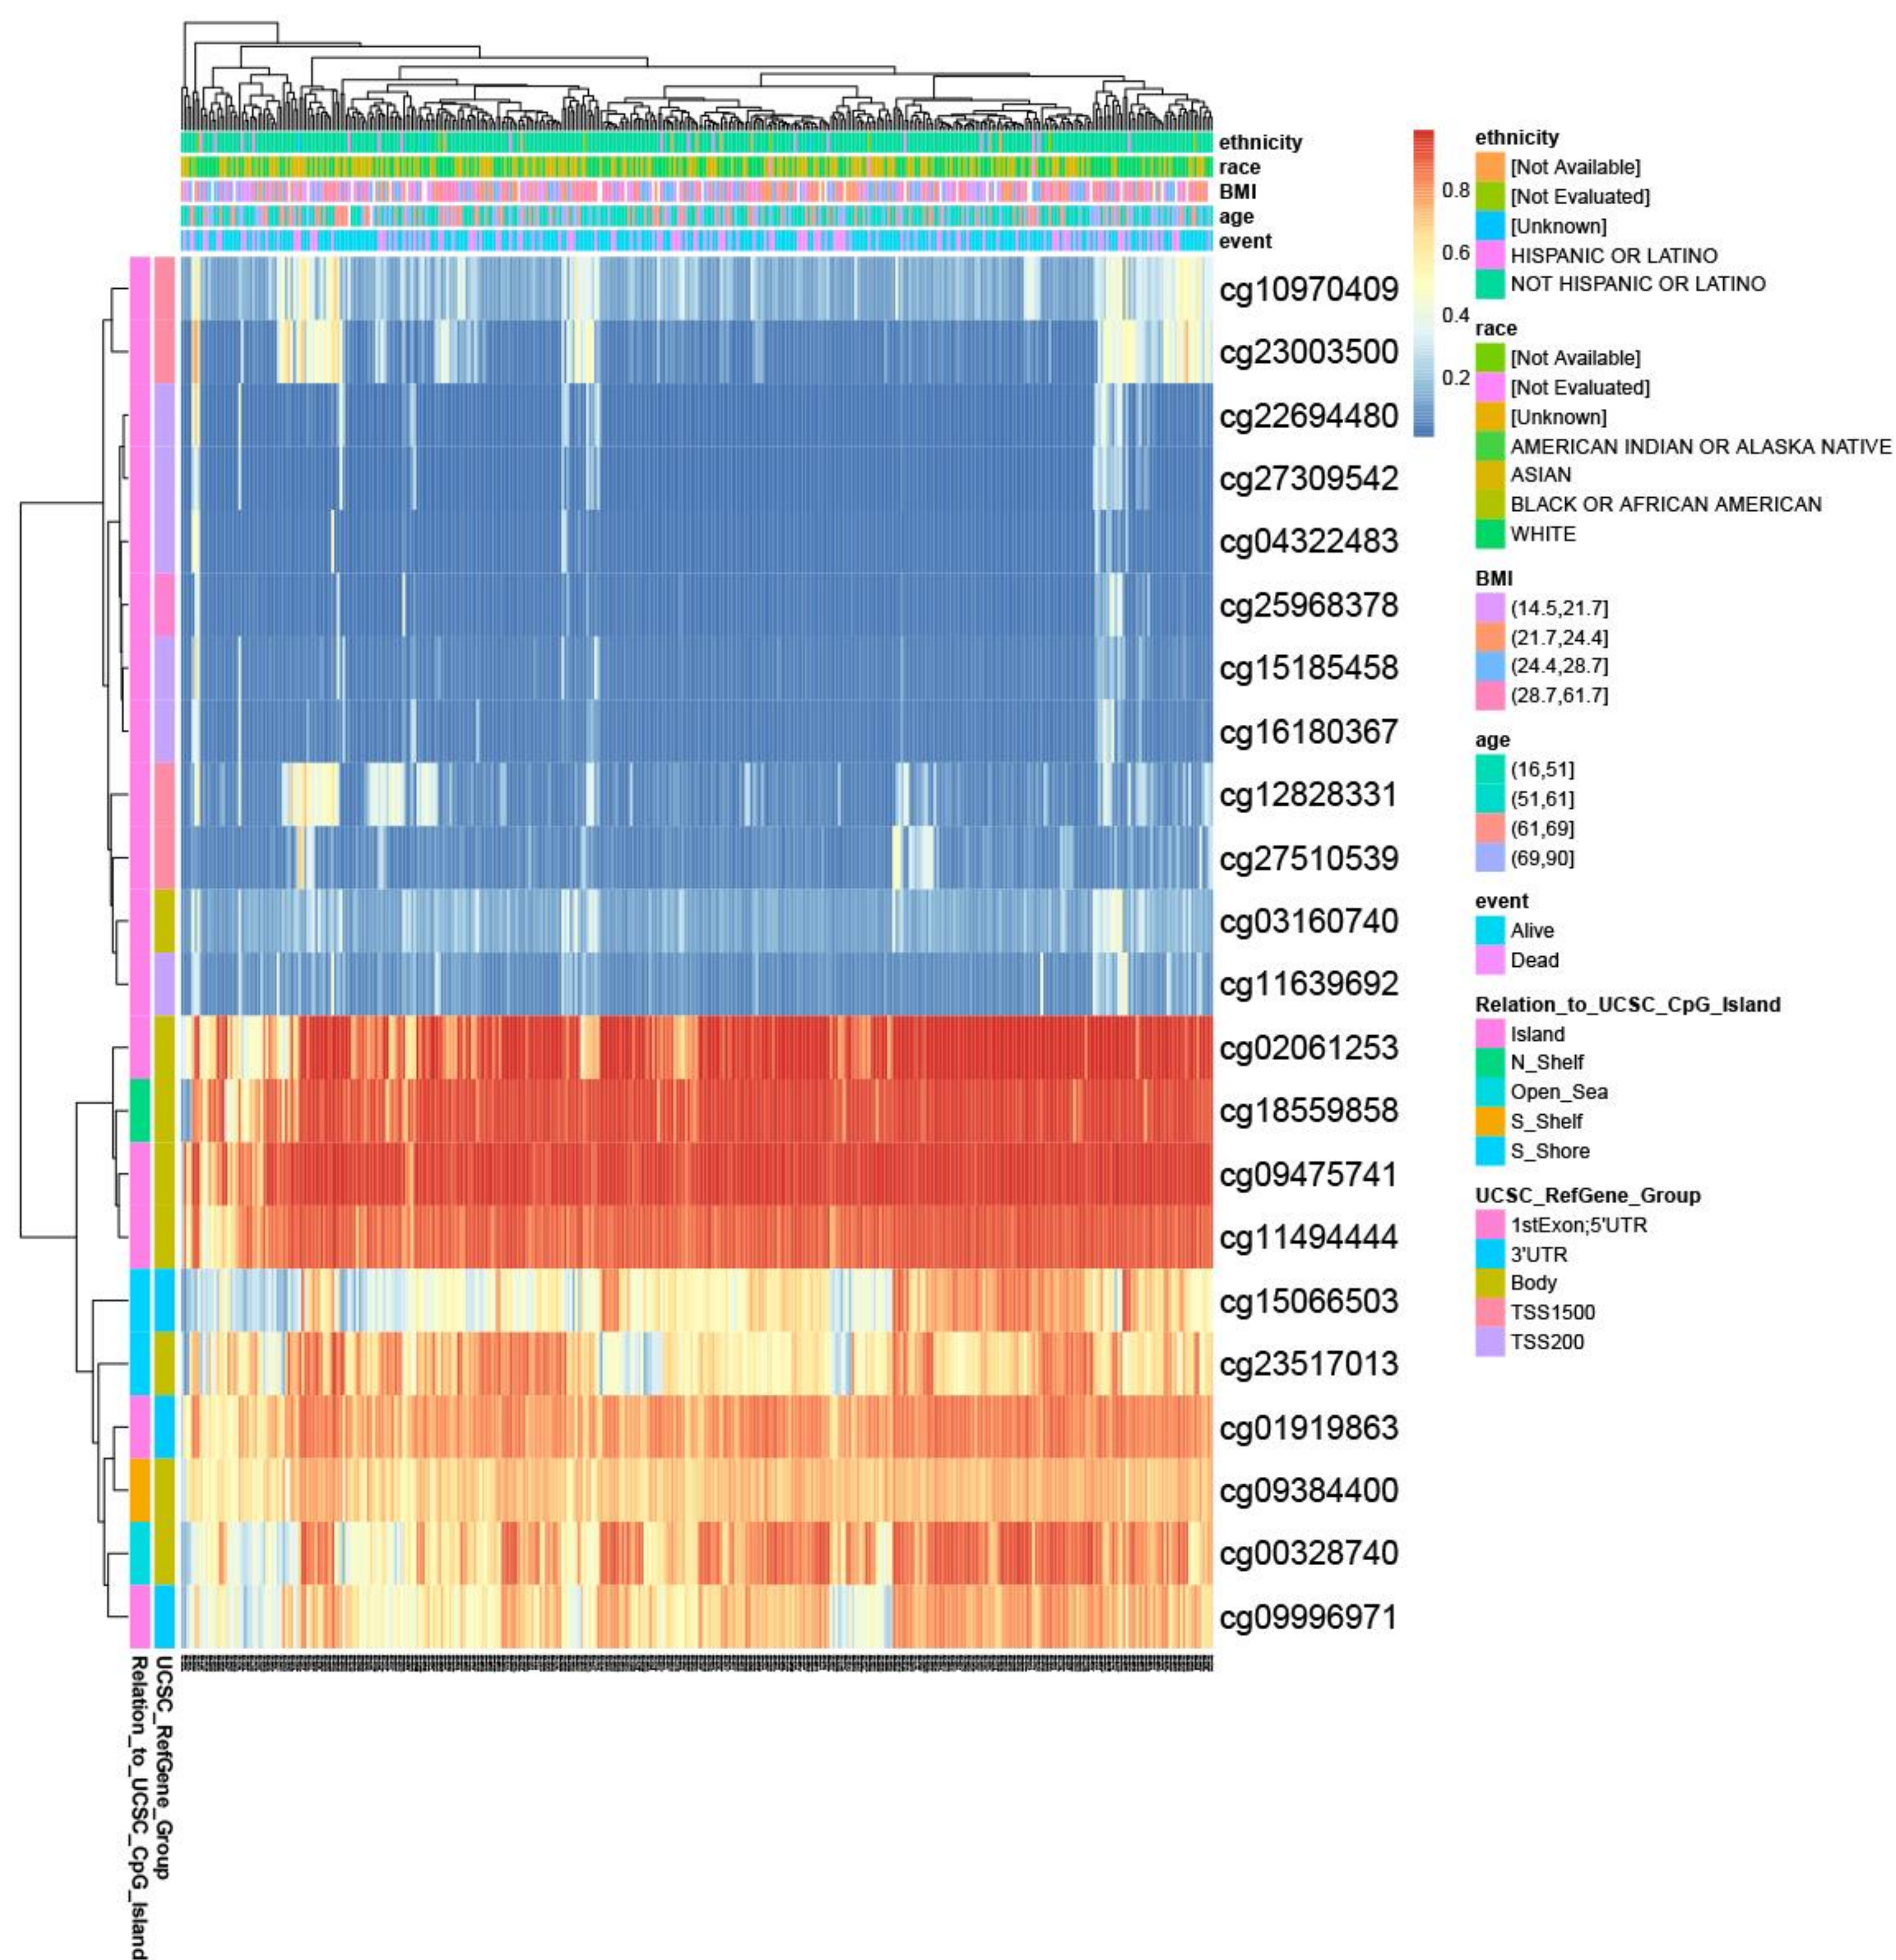

D

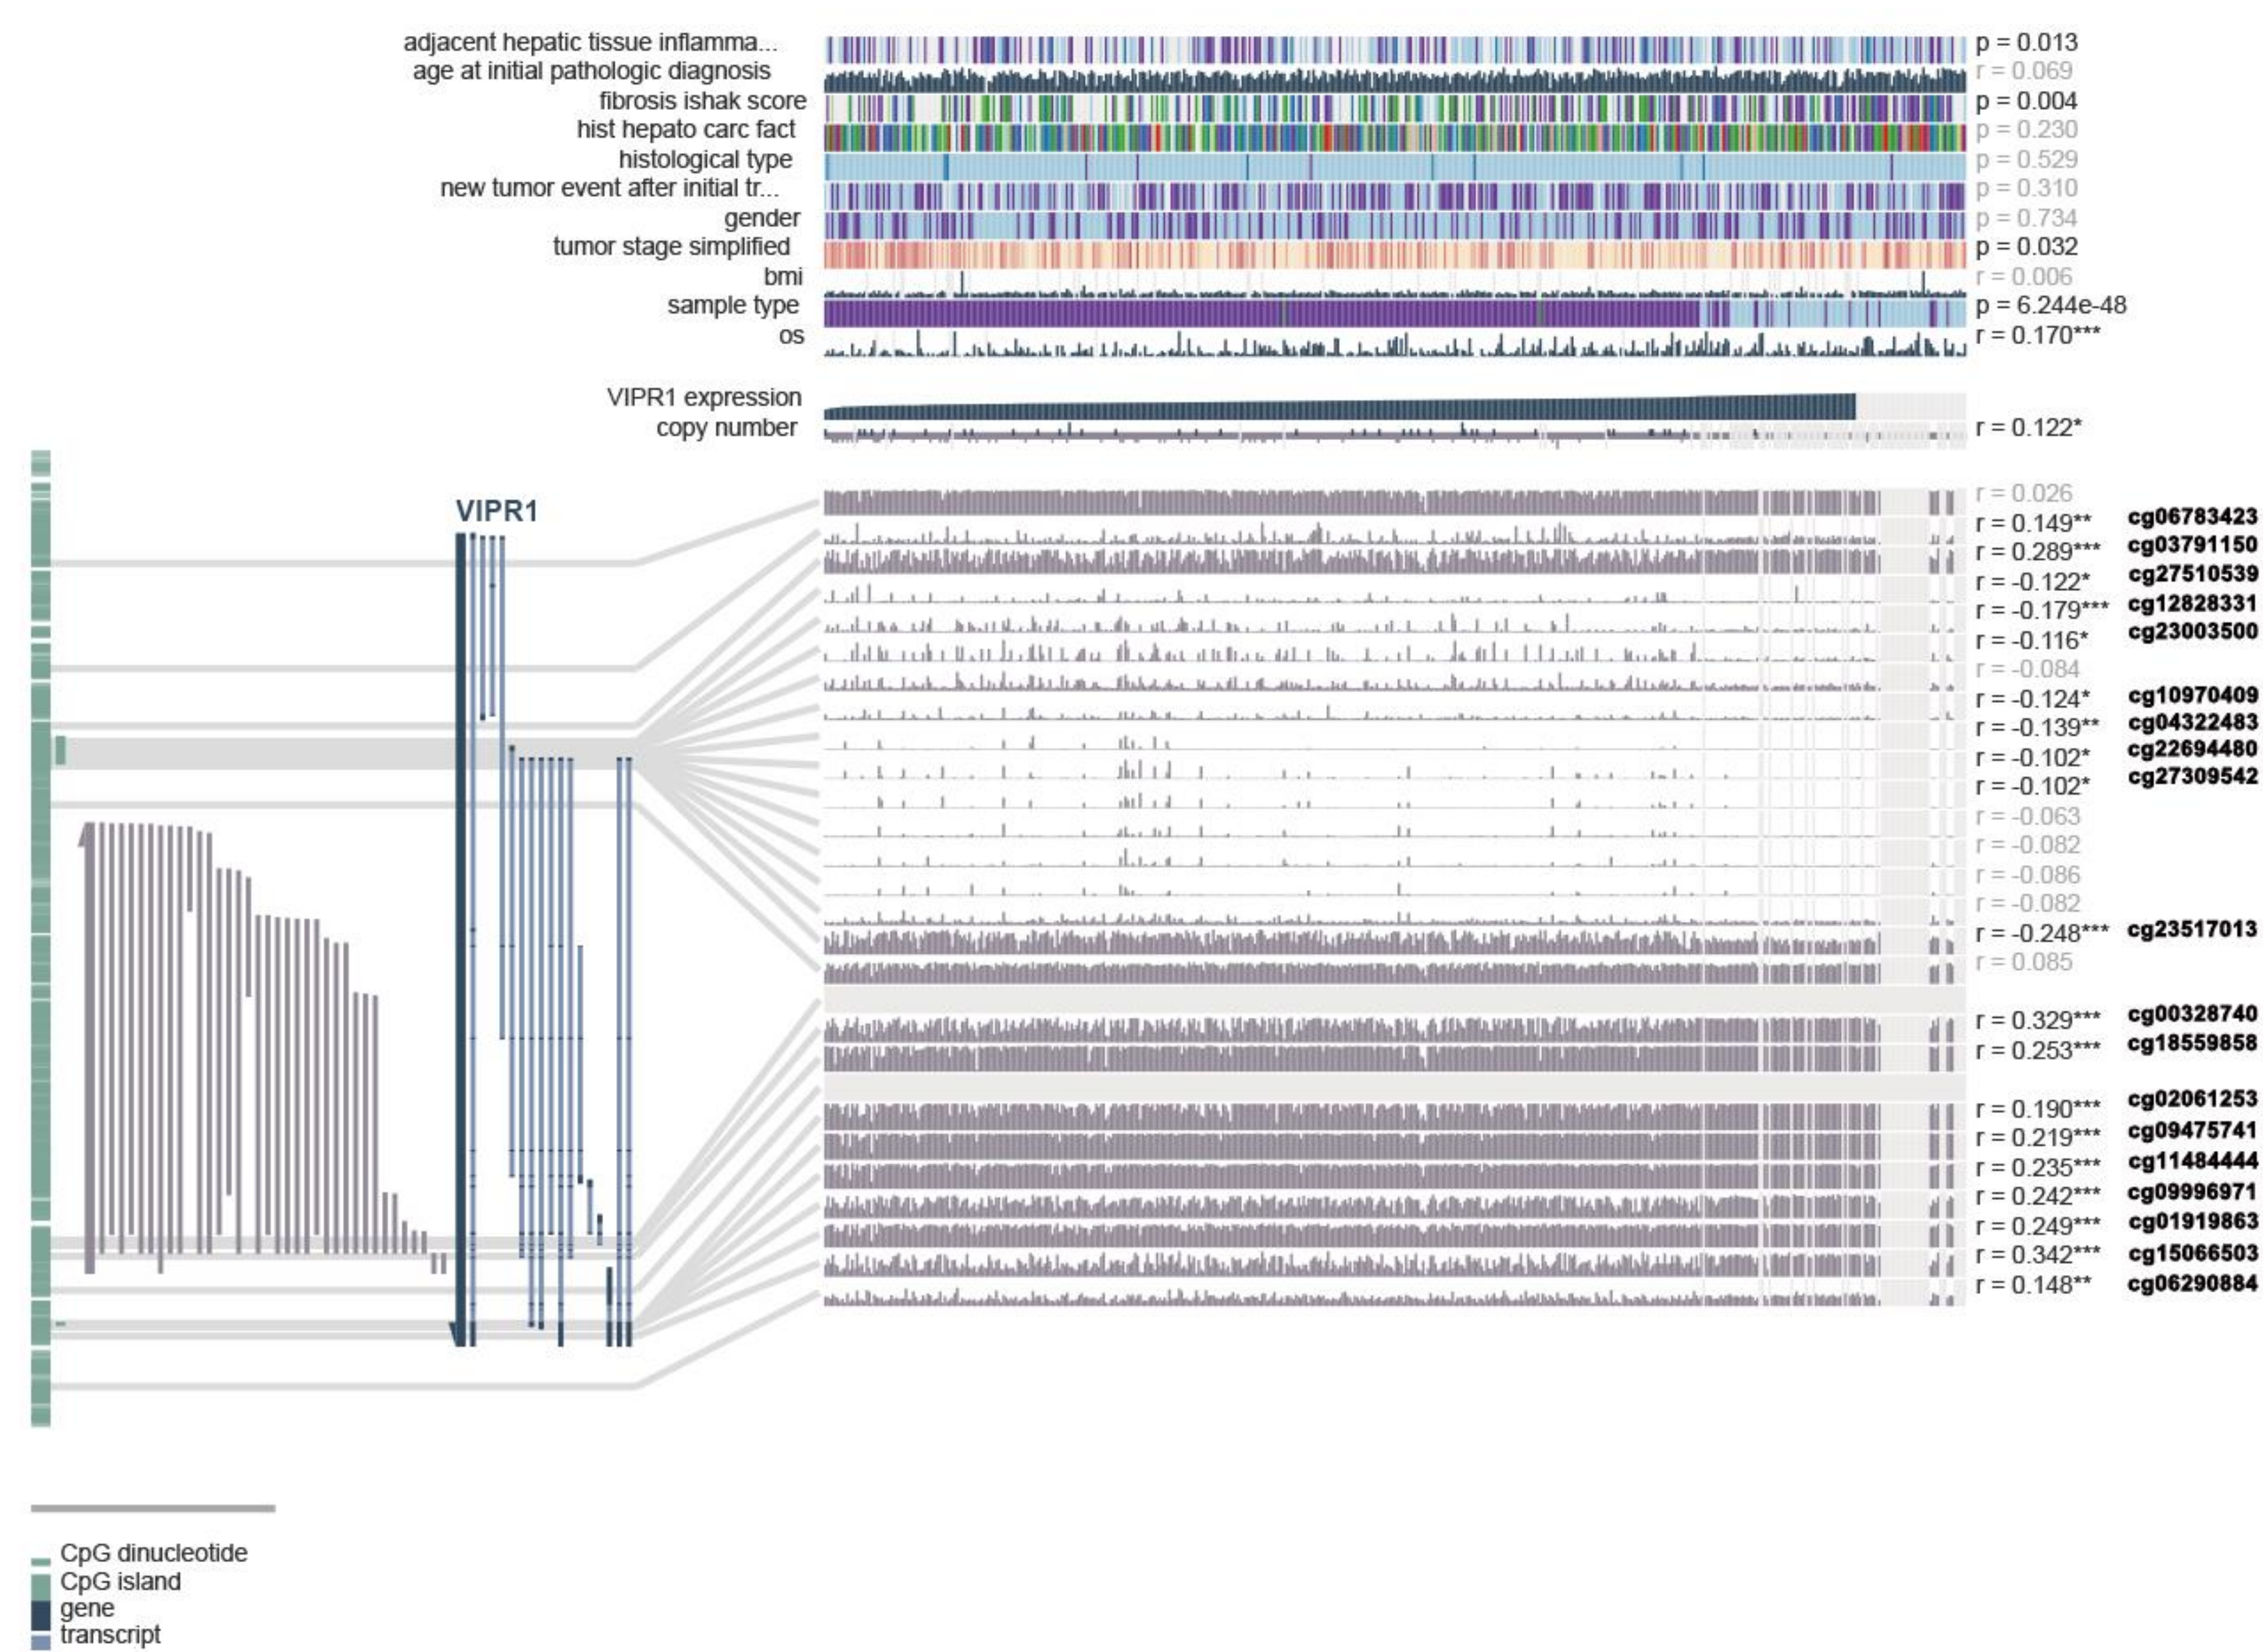

## lncRNA- AC079061.1

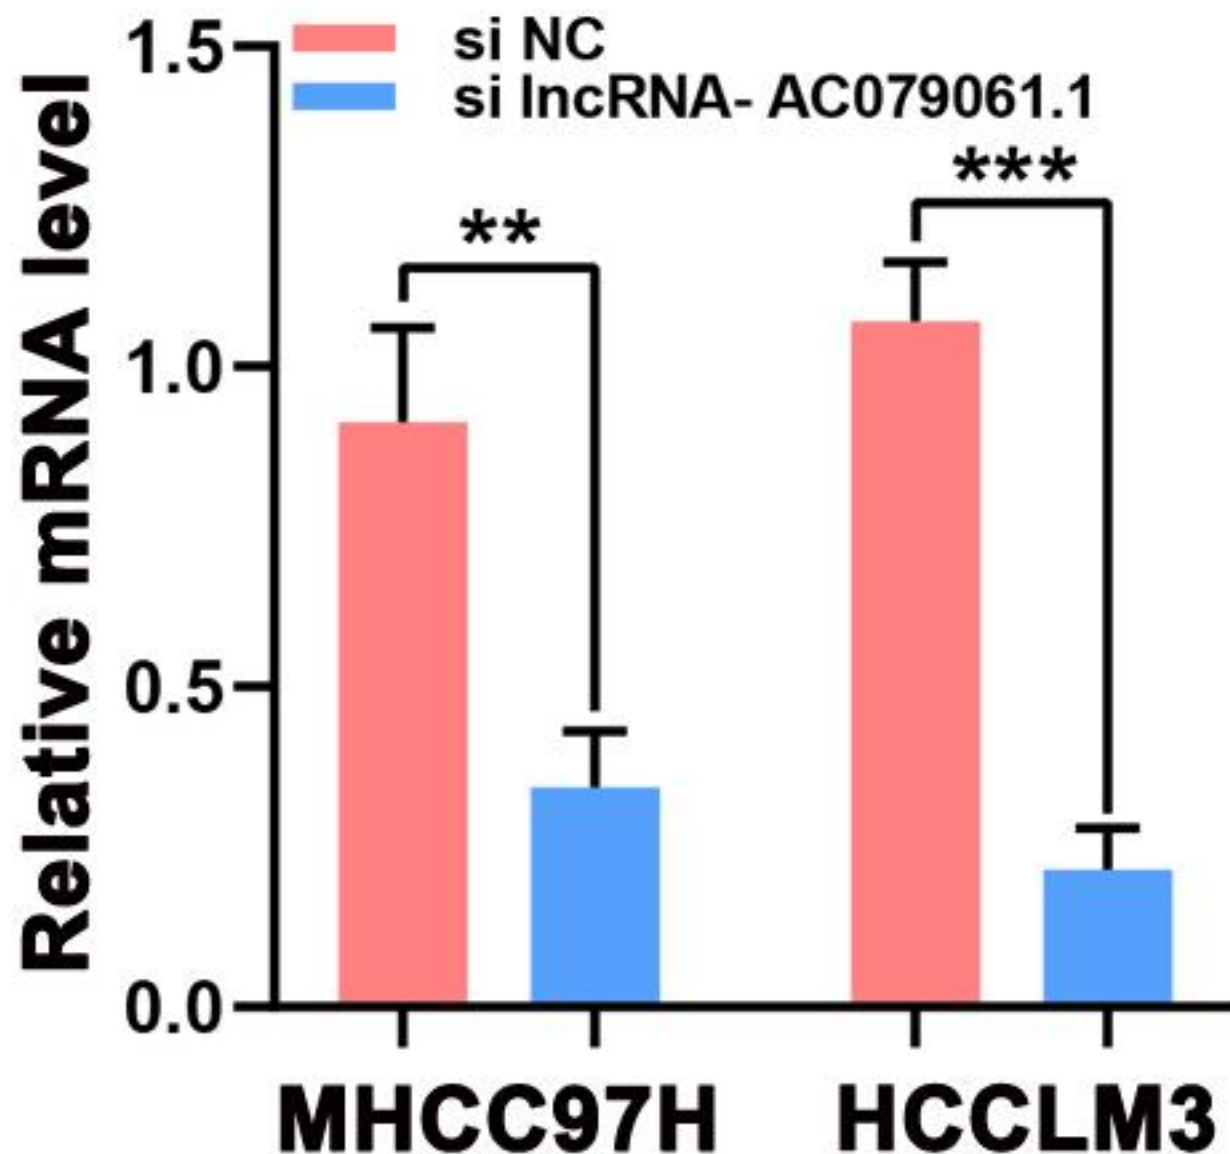

Correlation between CTRP drug sensitivity and mRNA expression

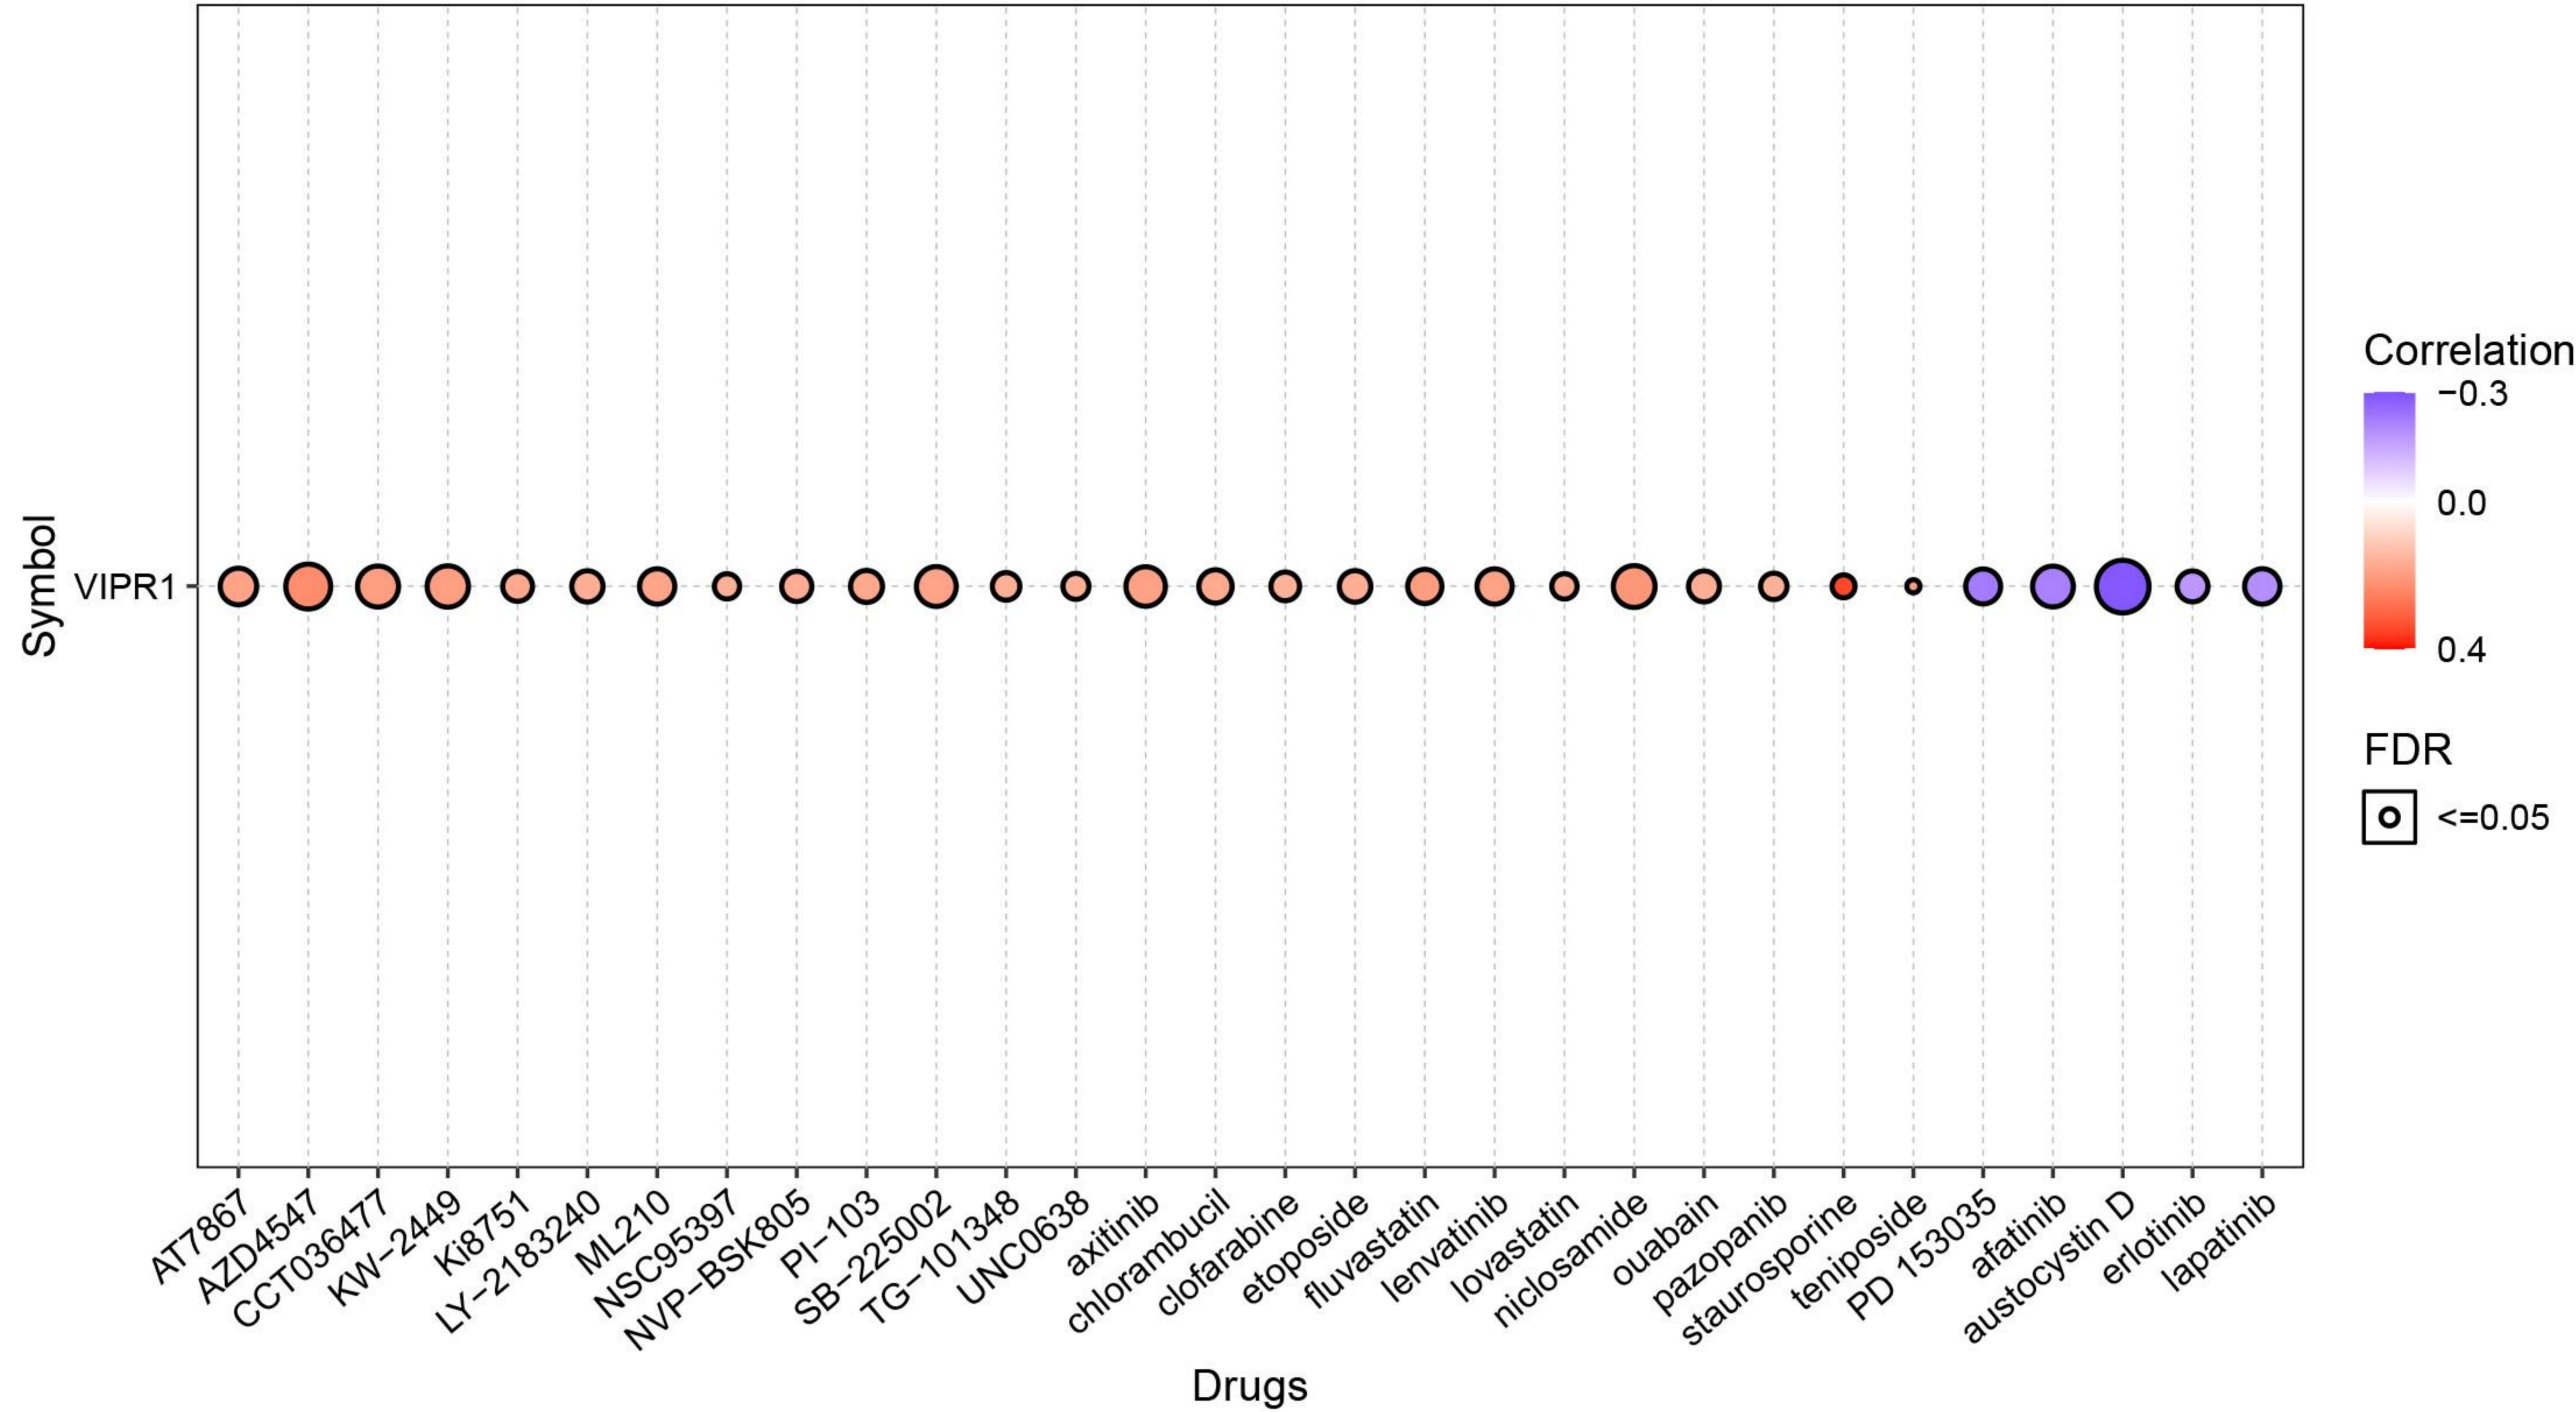

Correlation between GDSC drug sensitivity and mRNA expression

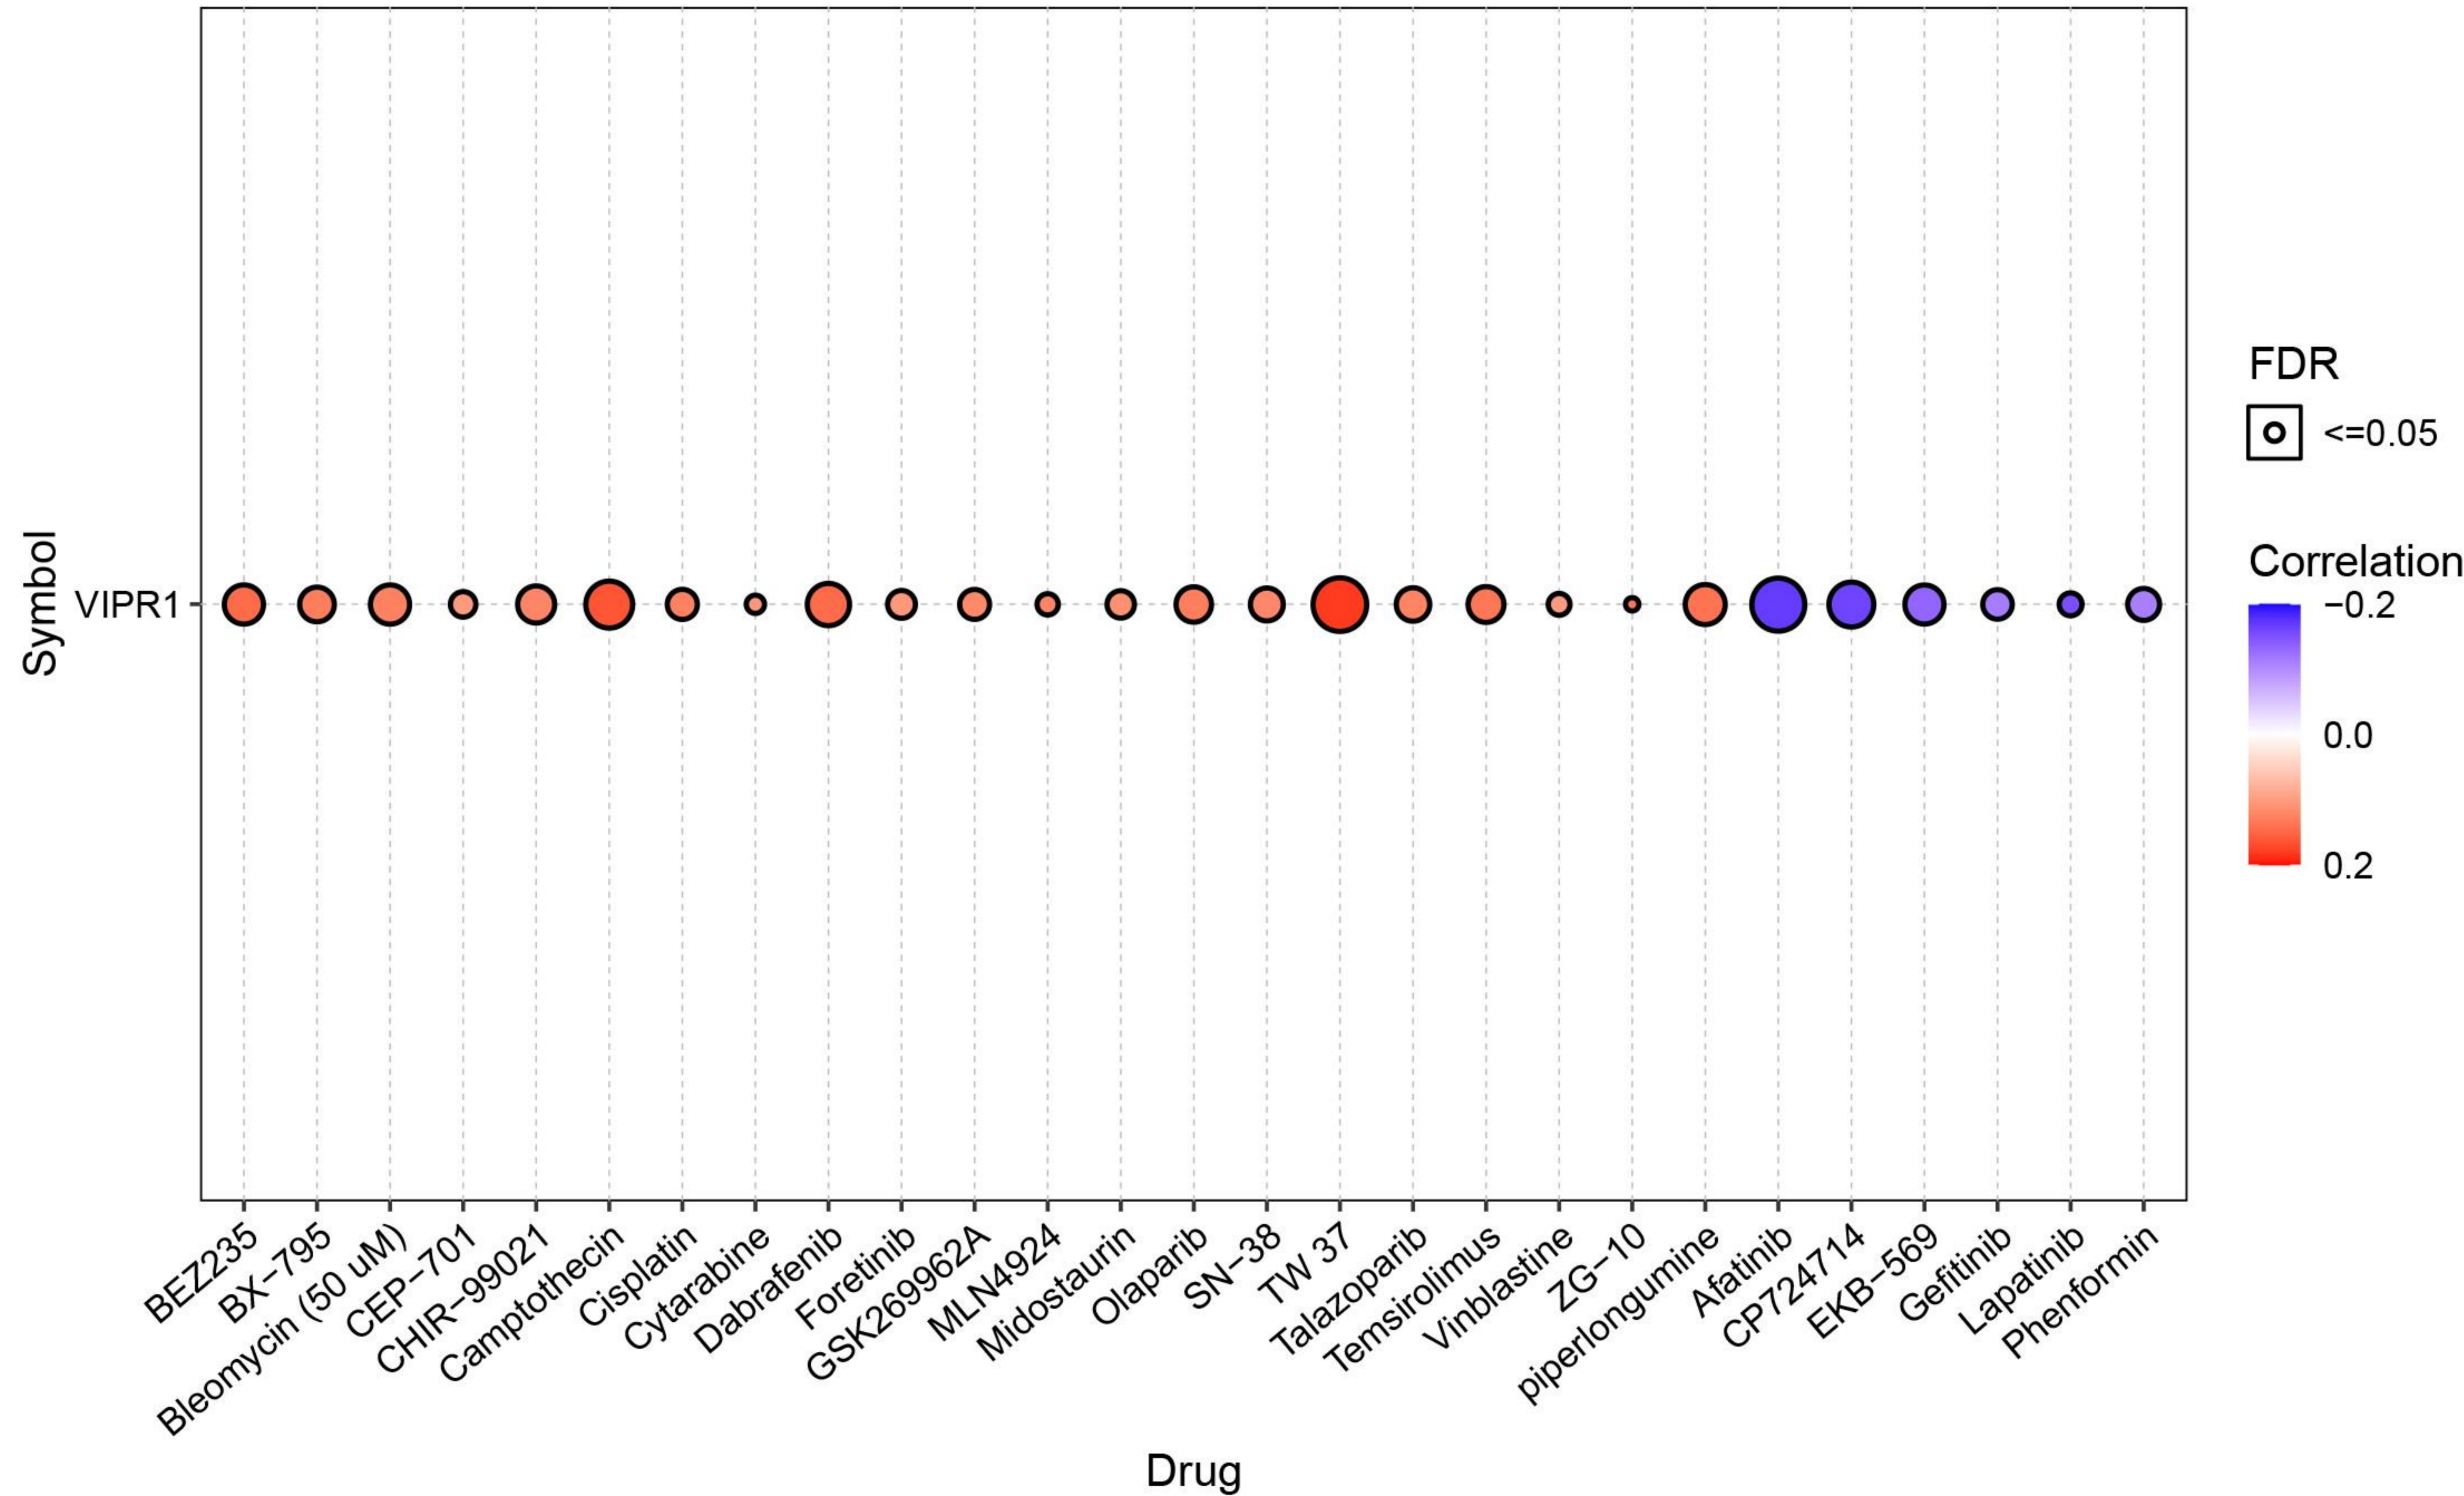

Supplement: Supplementary file 1 — Additional file 1: Table S1. The functional enrichment analysis of 100 VIPR1-related genes. Figure S1. Immune infiltration analysis of VIP and ADCYAP1 A. C. Explored the correlation between immune infiltration and VIP and ADCYAP1 through the ssGSEA algorithm in the “GSVA” R package. B. D. Evaluated the correlation between Treg/Tem/NK/iDC cells and VIP, Tem/NK/iDC/Mast cells and ADCYAP by the Pearson correlation analysis. *P<0.05, **P<0.01, ***P<0.001. Figure S2. The methylation analysis of VIPR1 in HCC. A. The correlation between VIPR1 expression and methyltransferases in HCC. B. The methylation level of VIPR1 in disease tissues and normal tissues by DiseaseMeth 2.0 database. C. The CpG expression level of VIPR1 in HCC. D. The methylation site of VIPR1 DNA sequence association with gene expression was visualized using MEXPRESS. The expression of VIPR1 is illustrated by the blue line in the center of the plot. Pearson’s correlation coefficients and p values for methylation sites and query gene expression are shown on the right side. Figure S3. Confirmation of the stable downregulation of lncRNAAC079061.1 transfected with lncRNA- AC079061.1 siRNA into MHCC97H and HCCLM3 HCC cells by qRT-PCR. *P<0.05, **P<0.01, ***P<0.001. Figure S4. The correlation between drugs and the VIPR1 mRNA expression of HCC in CTRP and GDSC database [file 12967_2022_3573_MOESM1_ESM.pdf]
